# Supplementary material for: Single-particle characterization of aerosols collected at a remote site in the Amazonian rainforest and an urban site in Manaus, Brazil
Source: Copernicus journal article supplement (doi:10.5194/acp-19-1221-2019), 2019-01-31

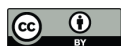

## *Supplement of*

# **Single-particle characterization of aerosols collected at a remote site in the Amazonian rainforest and an urban site in Manaus, Brazil**

Li Wu et al.

*Correspondence to:* Chul-Un Ro (curo@inha.ac.kr)

The copyright of individual parts of the supplement might differ from the CC BY 4.0 License.

Figure S1. Typical SEM images of aerosol particles for stage 1 (PM<sub>0.25-0.5</sub>), stage 2 (PM<sub>0.5-1.0</sub>), and stage 3 (PM<sub>1.0-2.0</sub>) samples of SA1 collected on Apr. 1, 2012 at the ATTO site. For convenience, ammonium sulfate, secondary organic aerosol, aluminosilicates, and reacted sea-salt are denoted as “AS”, “SOA”, “AlSi” and “rss”, respectively.

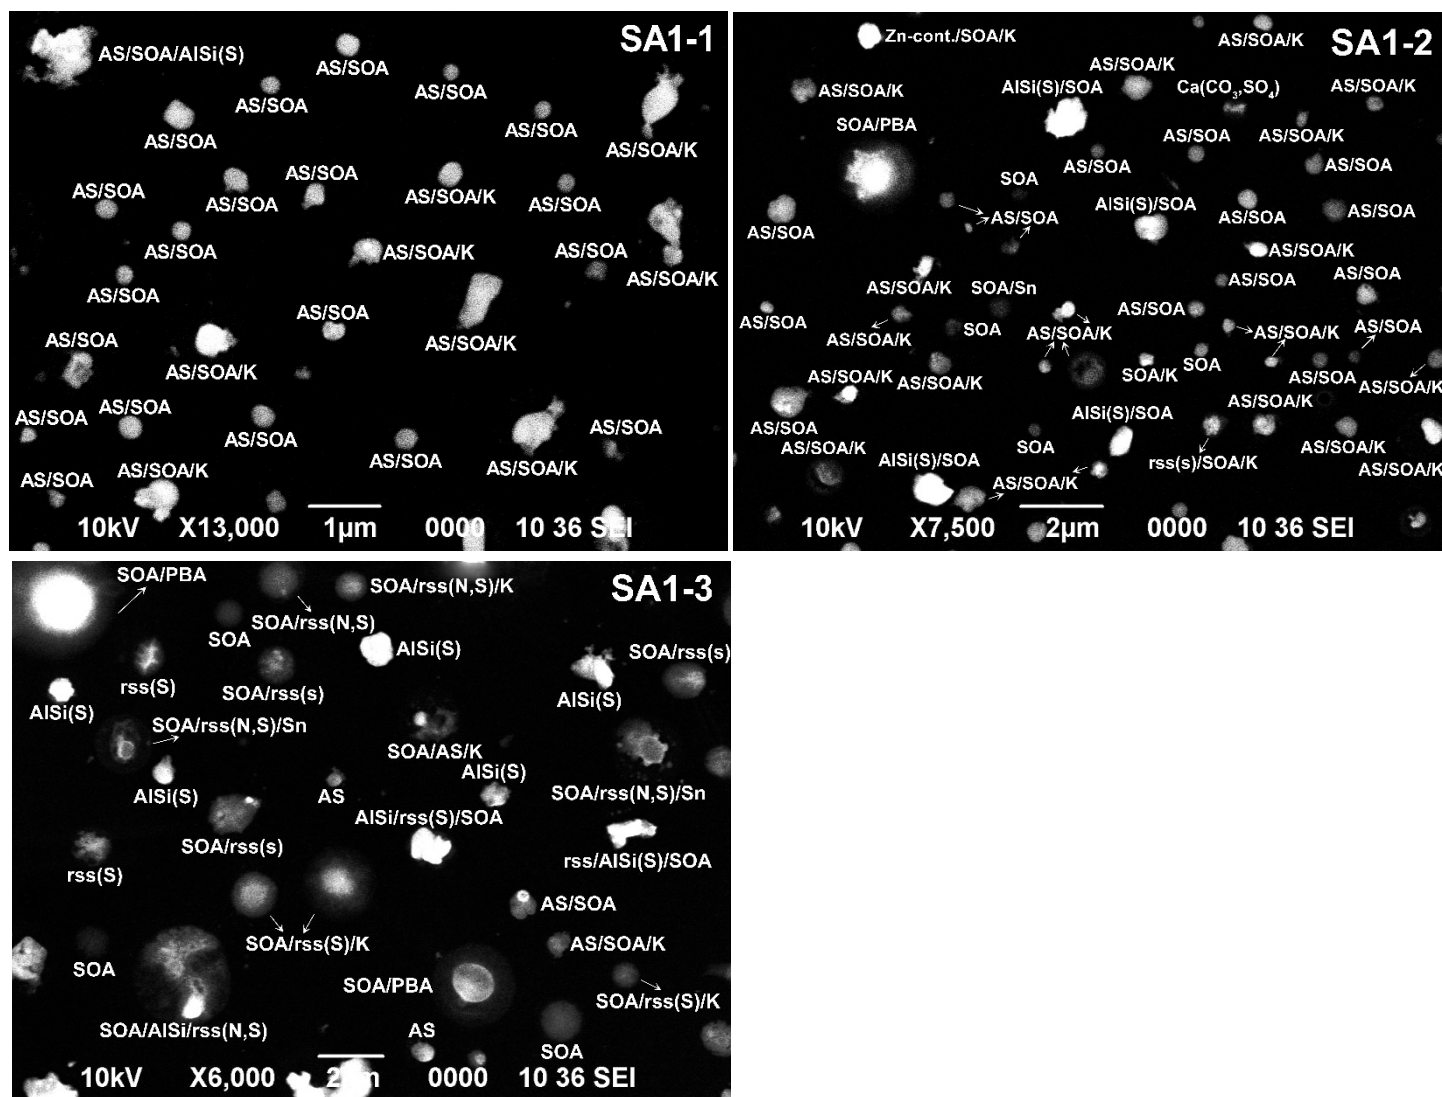

Figure S2. Typical SEM images of aerosol particles for stage 1 ( $PM_{0.25-0.5}$ ), stage 2 ( $PM_{0.5-1.0}$ ), and stage 3 ( $PM_{1.0-2.0}$ ) samples of SA2 collected on Apr. 16, 2012 at the ATTO site.

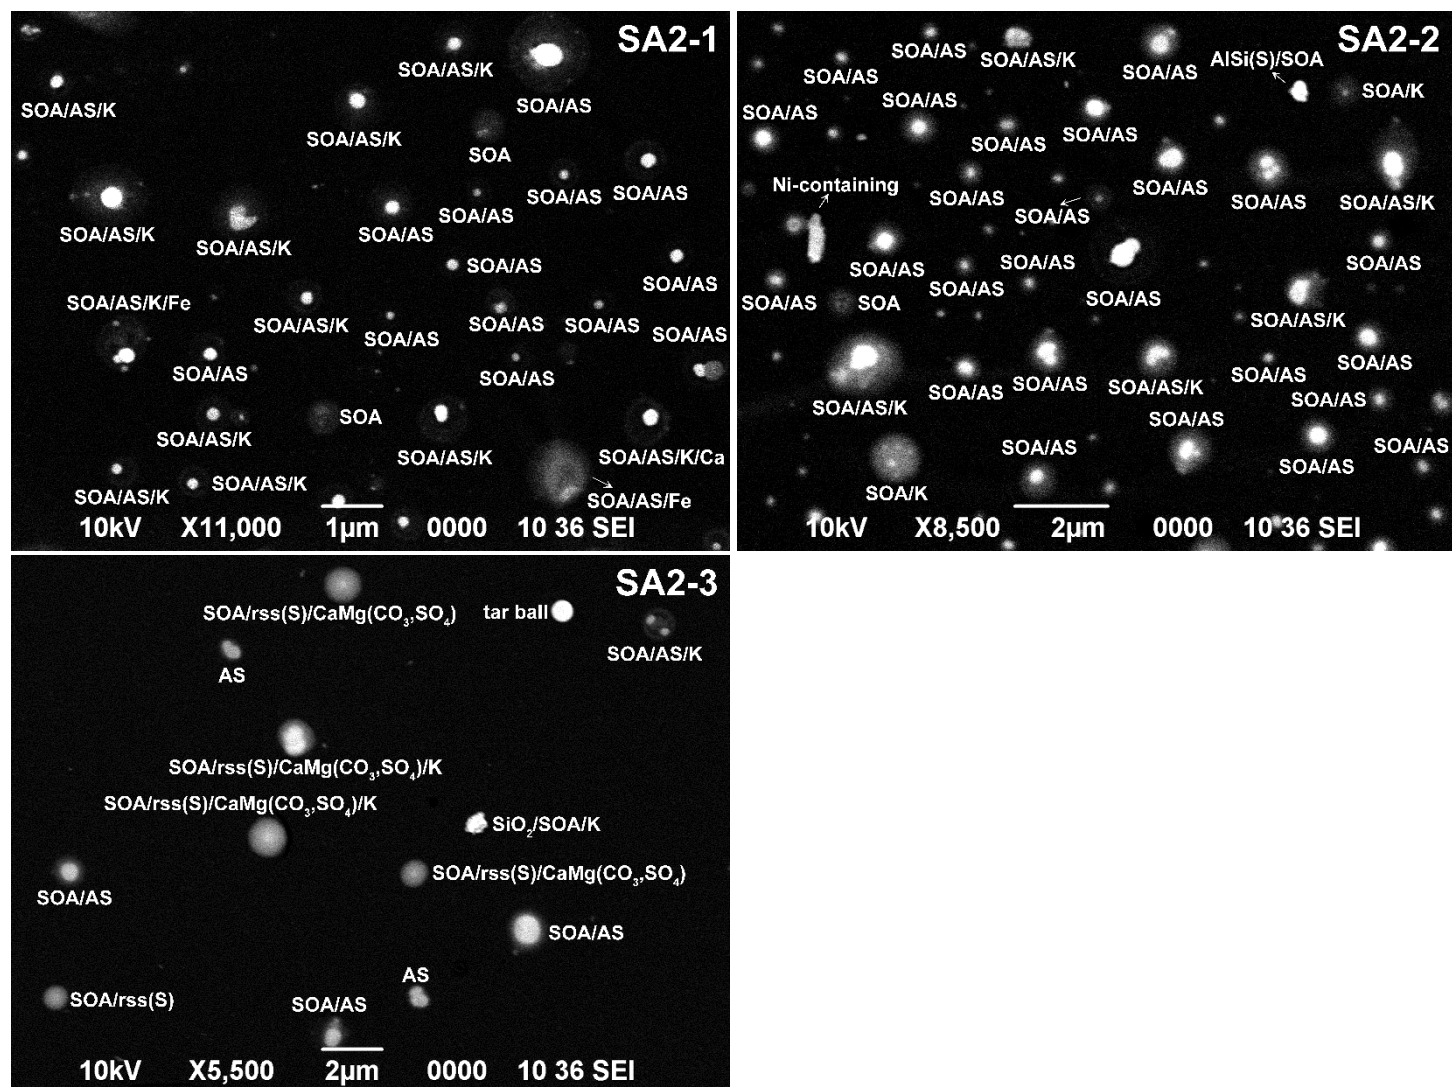

Figure S3. Typical SEM images of aerosol particles for stage 1 ( $PM_{0.25-0.5}$ ), stage 2 ( $PM_{0.5-1.0}$ ), and stage 3 ( $PM_{1.0-2.0}$ ) samples of SA3 collected on Apr. 17, 2012 at the ATTO site.

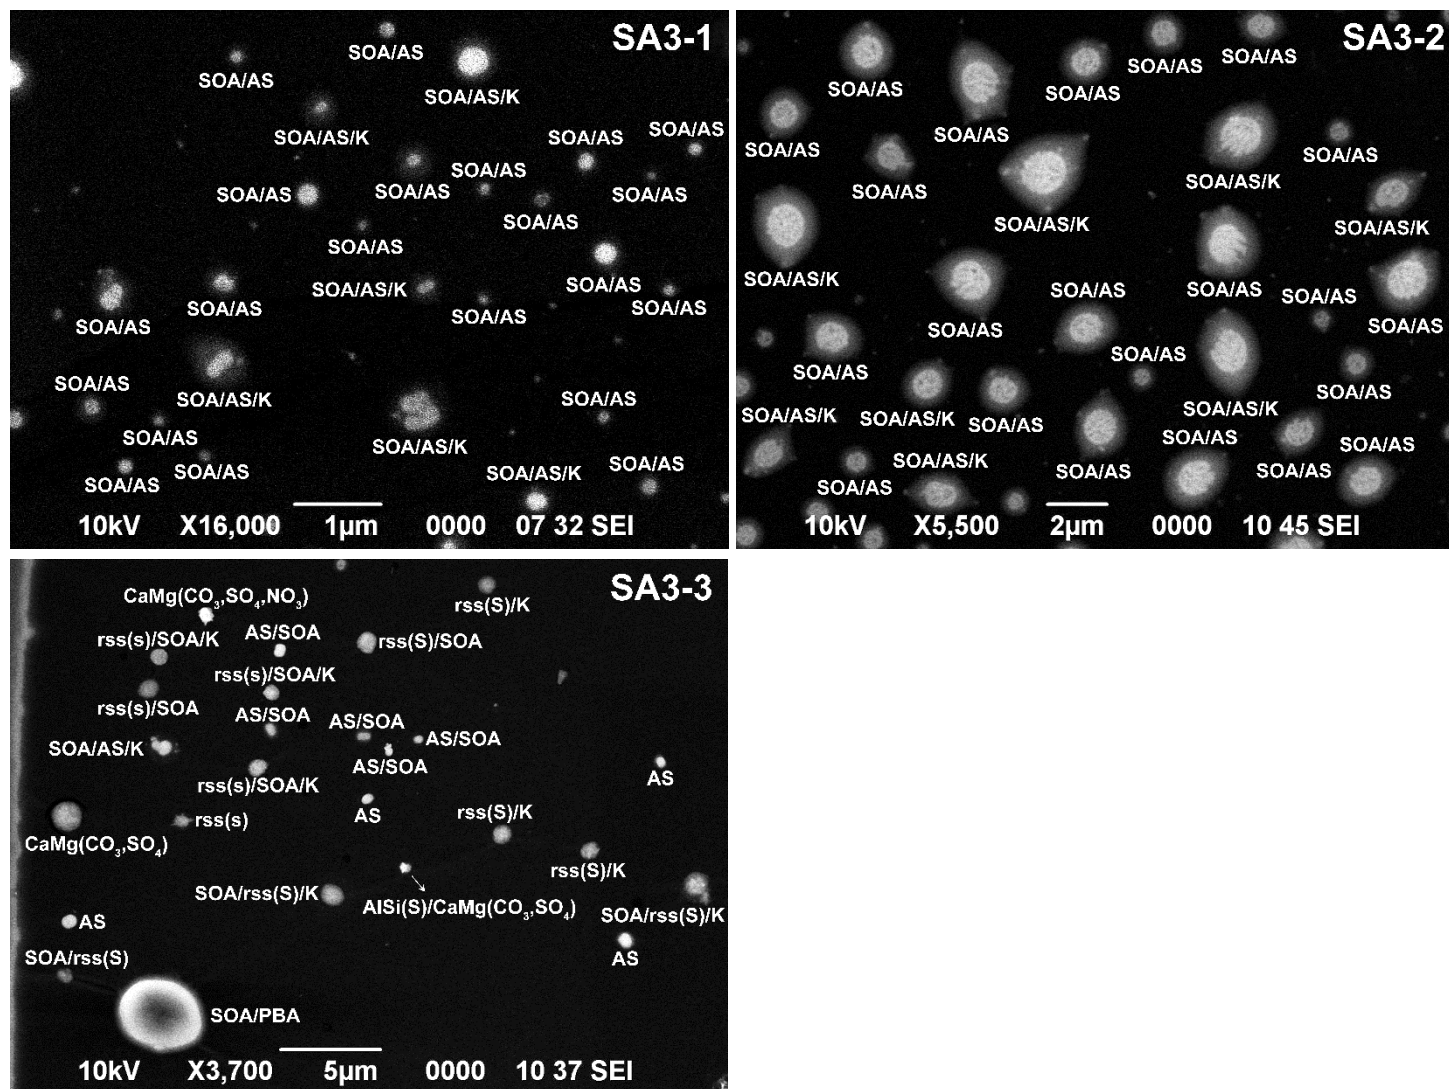

**SA4-1**  
10kV X15,000 4μm 0000 10 36 SEI

**SA4-2**  
10kV X5,000 5μm 0000 10 36 SEI

**SA4-3**  
10kV X4,000 5μm 0000 10 36 SEI

**SA4-4**  
10kV X2,200 10μm 0000 10 36 SEI

[illegible]



[illegible]

Figure S7. Typical SEM images of aerosol particles for the stage 1 ( $PM_{0.25-0.5}$ ), stage 2 ( $PM_{0.5-1.0}$ ), and stage 3 ( $PM_{1.0-2.0}$ ) samples of SM3 collected on May. 3, 2012 at the Manaus site.

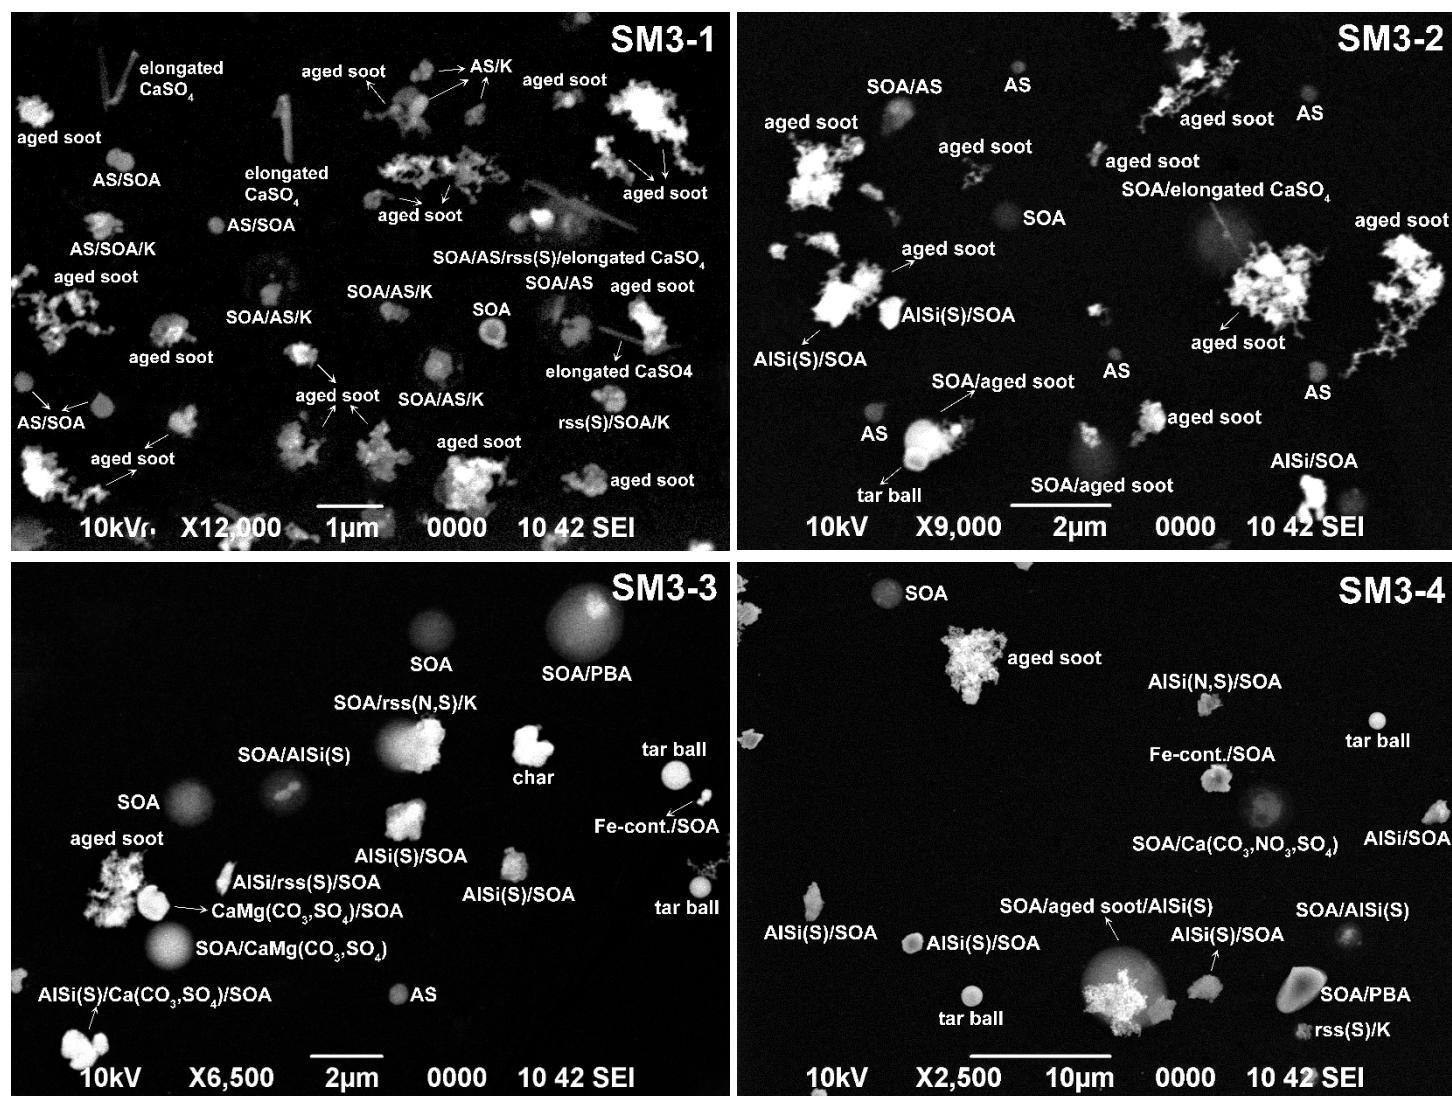

Supplement: Supplementary file 1 [file acp-19-1221-2019-supplement.pdf]
